# Supplementary material
Source: PubMed Central journal article supplement (PMC2517273)
Supplement: hesr0043-1244-SD1.pdf [file hesr0043-1244-SD1.pdf]

**Online Appendix Table 1**

Estimated model:  $QM_{i,t} = \alpha + \beta t + \gamma P_i + \delta P_i t + \sum_i \phi_i D_i$

|                                                    |                                       | <b>Physical<br/>Restraints</b> | <b>Short-<br/>term Pain</b> | <b>Pressure<br/>Ulcers</b> | <b>ADLs</b>      | <b>Infections</b> |
|----------------------------------------------------|---------------------------------------|--------------------------------|-----------------------------|----------------------------|------------------|-------------------|
| <b>Coefficients (P-value)</b>                      |                                       |                                |                             |                            |                  |                   |
| $\beta$                                            | <i>Time</i>                           | -0.33<br>(0.000)               | -0.05<br>(0.796)            | -0.07<br>(0.282)           | -0.11<br>(0.369) | -0.17<br>(0.086)  |
| $\gamma$                                           | <i>Post-publication<br/>(yes = 1)</i> | -1.19<br>(0.033)               | -3.14<br>(0.007)            | 0.33<br>(0.412)            | 0.26<br>(0.738)  | -0.68<br>(0.279)  |
| $\delta$                                           | <i>Time *Post-<br/>publication</i>    | 0.09<br>(0.410)                | 0.12<br>(0.604)             | 0.05<br>(0.557)            | 0.07<br>(0.634)  | 0.18<br>(0.136)   |
| $\alpha$                                           | <i>Constant</i>                       | 9.95<br>(0.000)                | 26.41<br>(0.000)            | 8.55<br>(0.000)            | 16.54<br>(0.000) | 15.92<br>(0.000)  |
| <b>Number of observations</b>                      |                                       |                                |                             |                            |                  |                   |
|                                                    |                                       | 5104                           | 3824                        | 5104                       | 4936             | 5004              |
| <b>Number of nursing<br/>homes (fixed effects)</b> |                                       |                                |                             |                            |                  |                   |
|                                                    |                                       | 647                            | 554                         | 647                        | 639              | 641               |
| <b>R-squared</b>                                   |                                       |                                |                             |                            |                  |                   |
|                                                    |                                       | 0.79                           | 0.71                        | 0.63                       | 0.49             | 0.58              |
| <b>Adjusted R-squared</b>                          |                                       |                                |                             |                            |                  |                   |
|                                                    |                                       | 0.75                           | 0.66                        | 0.58                       | 0.42             | 0.52              |

**Online Appendix Table 2**

Estimated model:  $QM_{it} = \alpha + \beta t + \gamma P_i + \delta_1 P_i N_i + \delta_2 P_i N_i^2 + \sum_i \phi_i D_i$

|                                                    |                                                             | <b>Physical<br/>Restrains</b> | <b>Short-<br/>term Pain</b> | <b>Pressure<br/>Ulcers</b> | <b>ADLs</b>      | <b>Infections</b> |
|----------------------------------------------------|-------------------------------------------------------------|-------------------------------|-----------------------------|----------------------------|------------------|-------------------|
| <b>Coefficients (P-value)</b>                      |                                                             |                               |                             |                            |                  |                   |
| $\beta$                                            | <i>Time</i>                                                 | -0.27<br>(0.000)              | 0.03<br>(0.802)             | -0.04<br>(0.328)           | -0.06<br>(0.404) | -0.06<br>(0.372)  |
| $\gamma$                                           | <i>Post-publication<br/>(yes = 1)</i>                       | -0.29<br>(0.426)              | -2.28<br>(0.003)            | 0.52<br>(0.046)            | 0.95<br>(0.057)  | 0.28<br>(0.491)   |
| $\delta_1$                                         | <i>Number of actions<br/>* Post-publication</i>             | -0.37<br>(0.000)              | -0.11<br>(0.632)            | -0.00<br>(0.972)           | -0.35<br>(0.013) | -0.14<br>(0.232)  |
| $\delta_2$                                         | <i>Number of actions<br/>squared *Post-<br/>publication</i> | 0.03<br>(0.000)               | 0.00<br>(0.934)             | 0.00<br>(0.910)            | 0.04<br>(0.003)  | 0.01<br>(0.181)   |
| $\alpha$                                           | <i>Constant</i>                                             | 9.82<br>(0.000)               | 26.23<br>(0.000)            | 8.48<br>(0.000)            | 16.43<br>(0.000) | 15.65<br>(0.000)  |
| <b>Number of observations</b>                      |                                                             | 5104                          | 3824                        | 5104                       | 4936             | 5004              |
| <b>Number of nursing homes<br/>(fixed effects)</b> |                                                             | 647                           | 554                         | 647                        | 639              | 641               |
| <b>R-squared</b>                                   |                                                             | 0.79                          | 0.71                        | 0.63                       | 0.50             | 0.58              |
| <b>Adjusted R-squared</b>                          |                                                             | 0.76                          | 0.66                        | 0.58                       | 0.42             | 0.52              |

**Online Appendix Table 3**

$$\text{Estimated model: } QM_{it} = \alpha + \beta t + \gamma P_i + \sum_{k=1}^{20} \delta_k P_i A_{ik} + \sum_i \phi_i D_i$$

|                               |                                                                                                                    | <b>Physical<br/>Restraints</b> | <b>Short-<br/>term Pain</b> | <b>Pressure<br/>Ulcers</b> | <b>ADLs</b>       | <b>Infections</b> |
|-------------------------------|--------------------------------------------------------------------------------------------------------------------|--------------------------------|-----------------------------|----------------------------|-------------------|-------------------|
| <b>Coefficients (P-value)</b> |                                                                                                                    |                                |                             |                            |                   |                   |
| $\beta$                       | <i>Time</i>                                                                                                        | -0.27<br>(0.000)               | 0.03<br>(0.815)             | -0.04<br>(0.330)           | -0.06<br>(0.400)  | -0.05<br>(0.380)  |
| $\gamma$                      | <i>Post-publication<br/>(yes = 1)</i>                                                                              | -0.46<br>(0.196)               | -2.57<br>(0.001)            | 0.67<br>(0.011)            | 1.17<br>(0.020)   | 0.49<br>(0.224)   |
| $\delta_1$                    | <i>Investigated<br/>reasons for<br/>scores * Post-<br/>publication</i>                                             | -0.29<br>(0.387)               | 1.40<br>(0.048)             | -0.23<br>(0.340)           | -1.43<br>(0.002)  | -0.65<br>(0.084)  |
| $\delta_2$                    | <i>Developed new<br/>care protocols *<br/>Post-publication</i>                                                     | -1.14<br>(0.003)               | 2.52<br>(0.004)             | -0.50<br>(0.078)           | 0.84<br>(0.125)   | 0.35<br>(0.431)   |
| $\delta_3$                    | <i>Changed existing<br/>care protocols *<br/>Post-publication</i>                                                  | 0.05<br>(0.898)                | -2.13<br>(0.011)            | 0.47<br>(0.079)            | 0.26<br>(0.618)   | 0.17<br>(0.682)   |
| $\delta_4$                    | <i>Re-allocated staff<br/>from other<br/>activities to care<br/>related to this<br/>QM * Post-<br/>publication</i> | 0.96<br>(0.137)                | 5.40<br>(0.004)             | -0.16<br>(0.706)           | 1.25<br>(0.195)   | 1.06<br>(0.160)   |
| $\delta_5$                    | <i>Trained staff<br/>specifically for<br/>targeted QM *<br/>Post-publication</i>                                   | 1.06<br>(0.003)                | -2.00<br>(0.009)            | 0.12<br>(0.657)            | -0.46<br>(0.363)  | -0.21<br>(0.605)  |
| $\delta_6$                    | <i>Changed medical<br/>director * Post-<br/>publication</i>                                                        | -7.12<br>(0.002)               | -0.24<br>(0.955)            | -3.58<br>(0.035)           | -5.10<br>(0.114)  | -1.51<br>(0.564)  |
| $\delta_7$                    | <i>Changed nursing<br/>director * Post-<br/>publication</i>                                                        | 0.25<br>(0.712)                | -1.67<br>(0.318)            | 1.36<br>(0.005)            | 1.82<br>(0.065)   | 0.21<br>(0.782)   |
| $\delta_8$                    | <i>Changed work<br/>organization to<br/>empower workers<br/>* Post-<br/>publication</i>                            | -0.30<br>(0.465)               | -0.26<br>(0.772)            | 0.546<br>(0.073)           | -0.083<br>(0.886) | 0.48<br>(0.312)   |
| $\delta_9$                    | <i>Revised job<br/>descriptions *<br/>Post-publication</i>                                                         | 1.12<br>(0.023)                | 0.22<br>(0.847)             | -0.02<br>(0.951)           | -0.35<br>(0.618)  | -0.98<br>(0.079)  |

|               |                                                                                                                           |                  |                  |                  |                  |                  |
|---------------|---------------------------------------------------------------------------------------------------------------------------|------------------|------------------|------------------|------------------|------------------|
| $\delta_{10}$ | <i>Hired more staff * Post-publication</i>                                                                                | 1.68<br>(0.003)  | 2.18<br>(0.112)  | 0.32<br>(0.439)  | 1.95<br>(0.018)  | 0.51<br>(0.437)  |
| $\delta_{11}$ | <i>Contracted for more staff * Post-publication</i>                                                                       | 1.34<br>(0.218)  | -0.54<br>(0.843) | -1.50<br>(0.057) | 1.20<br>(0.437)  | -2.27<br>(0.065) |
| $\delta_{12}$ | <i>Increased wages/benefits * Post-publication</i>                                                                        | -1.57<br>(0.006) | -3.46<br>(0.013) | 0.75<br>(0.073)  | -0.29<br>(0.730) | 1.16<br>(0.077)  |
| $\delta_{13}$ | <i>Other initiatives to hire/retain staff * Post-publication</i>                                                          | -0.36<br>(0.500) | 0.26<br>(0.816)  | 0.21<br>(0.600)  | 0.49<br>(0.525)  | 1.48<br>(0.018)  |
| $\delta_{14}$ | <i>Increased private pay prices * Post-publication</i>                                                                    | -3.25<br>(0.000) | -0.45<br>(0.793) | 0.41<br>(0.448)  | -1.88<br>(0.075) | -0.73<br>(0.386) |
| $\delta_{15}$ | <i>Started an organized quality improvement program * Post-publication</i>                                                | 0.93<br>(0.019)  | -1.76<br>(0.054) | 0.15<br>(0.597)  | -0.14<br>(0.810) | 0.46<br>(0.316)  |
| $\delta_{16}$ | <i>Changed priorities of existing quality assurance or quality improvement program to focus on QMs * Post-publication</i> | -0.39<br>(0.221) | -0.15<br>(0.830) | -0.03<br>(0.911) | -0.20<br>(0.655) | -0.41<br>(0.256) |
| $\delta_{17}$ | <i>Changed the type of patient admitted * Post-publication</i>                                                            | 0.91<br>(0.222)  | 8.49<br>(0.000)  | 0.29<br>(0.592)  | 0.59<br>(0.565)  | 1.40<br>(0.095)  |
| $\delta_{18}$ | <i>Changed ownership * Post-publication</i>                                                                               | 8.50<br>(0.000)  | -2.02<br>(0.593) | -0.82<br>(0.582) | 1.20<br>(0.731)  | -2.69<br>(0.275) |
| $\delta_{19}$ | <i>Requested help from the QIO * Post-publication</i>                                                                     | -1.07<br>(0.002) | -0.73<br>(0.356) | -1.23<br>(0.000) | 0.04<br>(0.935)  | -0.64<br>(0.108) |
| $\delta_{20}$ | <i>Purchased new technology/equipment * Post-publication</i>                                                              | -0.43<br>(0.346) | 0.02<br>(0.985)  | 0.48<br>(0.142)  | 0.03<br>(0.964)  | -0.57<br>(0.266) |
| $\alpha$      | <i>Constant</i>                                                                                                           | 9.82<br>(0.000)  | 26.25<br>(0.000) | 8.48<br>(0.000)  | 16.44<br>(0.000) | 15.65<br>(0.000) |

|  |                                                |      |      |      |      |      |
|--|------------------------------------------------|------|------|------|------|------|
|  |                                                |      |      |      |      |      |
|  | <b>Number of observations</b>                  | 5104 | 3824 | 5104 | 4936 | 5004 |
|  | <b>Number of nursing homes (fixed effects)</b> | 647  | 554  | 647  | 639  | 641  |
|  | <b>R-squared</b>                               | 0.79 | 0.72 | 0.64 | 0.50 | 0.58 |
|  | <b>Adjusted R-squared</b>                      | 0.76 | 0.67 | 0.58 | 0.42 | 0.52 |
